# Supplementary material for: SIRPα polymorphisms, but not the prion protein, control phagocytosis of apoptotic cells
Source: PubMed Central journal article supplement — J Exp Med. 2013 Nov 18;210(12):2539–52. doi: 10.1084/jem.20131274 (PMC3832919; doi:10.1084/jem.20131274), 2013-11-18
Supplement: supp_jem.20131274_JEM_20131274_sm.pdf [file supp_jem.20131274_JEM_20131274_sm.pdf]

SUPPLEMENTAL MATERIAL

Nuvolone et al., <http://www.jem.org/cgi/content/full/jem.20131274/DC1>

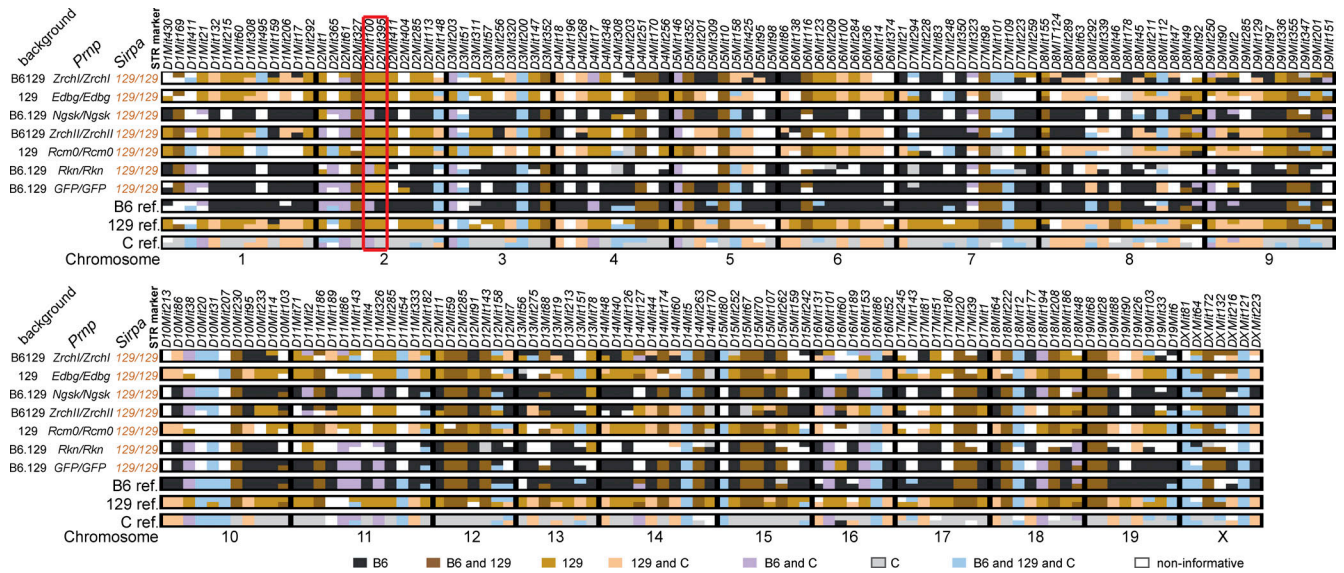

**Figure S1. Whole-genome STR analysis of the seven *Prnp*<sup>-/-</sup> lines analyzed in this study.** The red border marks the region on Chr 2 containing *Prnp* and *Sirpa*. For each line, a representative mouse is shown. For heterozygous markers, the strain-defining color is arbitrary and not intended to designate a specific haplotype. Data show representative mice of at least three animals analyzed per group, except for *Prnp*<sup>Rcm0/Rcm0</sup> and *Prnp*<sup>Rkn/Rkn</sup>, for which one mouse was analyzed.

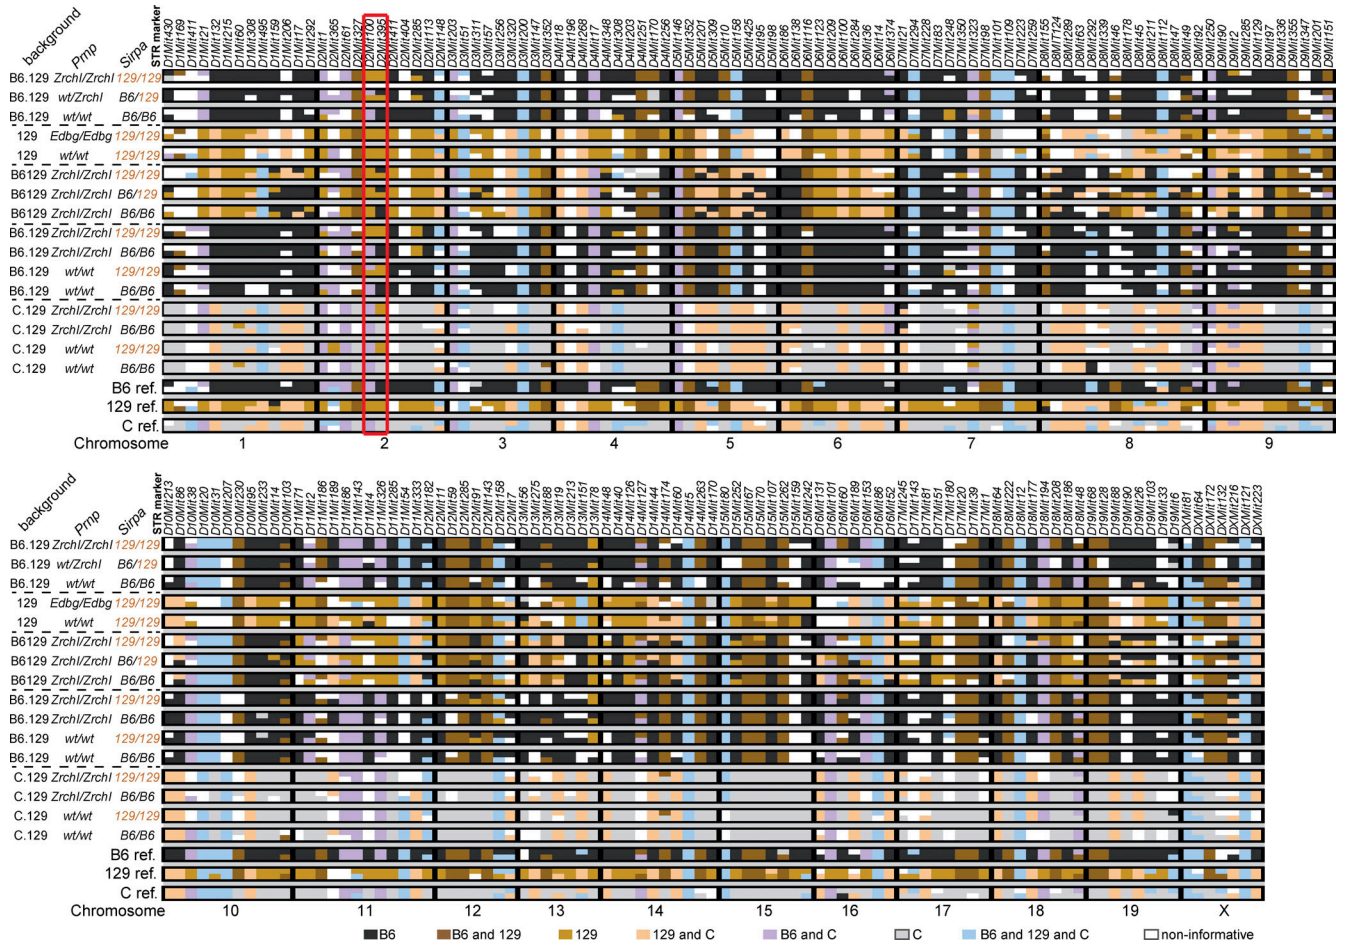

**Figure S2. Whole-genome STR analysis of *Prnp*<sup>Zrchl/Zrchl</sup>, *Prnp*<sup>Edbg/Edbg</sup>, and control mice.** The red box denotes the region on Chr 2 containing *Prnp* and *Sirpa*. Each line represents one mouse of strain shown at left. For heterozygous markers, the strain-defining color is arbitrary and not intended to designate a specific haplotype. Reference B6, 129, and C samples and 129-*Prnp*<sup>Edbg/Edbg</sup> are the same as in Fig. S1. Data show representative mice of at least three animals analyzed per group.

Table S1, included as a separate PDF file, shows a list of 305 differentially expressed genes identified by RNA-Seq ( $P < 0.05$ ), sorted by  $\text{Log}_2$  fold change.

Table S2, included as a separate PDF file, shows genes containing nonsynonymous SNPs between B6.129-*Prnp*<sup>wt/wt</sup> and B6.129-*Prnp*<sup>Zrch1/Zrch1</sup> pMΦs sorted by chromosome location.

**Table S3.** Overview of allelotypes of the four candidate genes on Chr 2 linked to *Prnp* (*Sirpa*, *Mertk*, *Tyro3*, and *Thbs1*) in five *Prnp*-KO strains and congenic B6.129 mice with different combinations of *Prnp* and *Sirpa* alleles

| Strain                                                                     | <i>Prnp</i>                      | <i>Sirpa</i>                     | <i>Mertk</i>                     | <i>Tyro3</i>                     | <i>Thbs1</i>                     |
|----------------------------------------------------------------------------|----------------------------------|----------------------------------|----------------------------------|----------------------------------|----------------------------------|
|                                                                            | chr2:131,909,927-<br>131,938,431 | chr2:129,592,838-<br>129,632,228 | chr2:128,698,996-<br>128,802,188 | chr2:119,799,513-<br>119,818,103 | chr2:118,111,921-<br>118,127,133 |
| <i>Prnp</i> <sup>Zrch1/Zrch1</sup>                                         | KO                               | 129/129                          | 129/129                          | 129/129                          | 129/129                          |
| <i>Prnp</i> <sup>Ngsk/Ngsk</sup>                                           | KO                               | 129/129                          | 129/129                          | B6/B6                            | B6/B6                            |
| <i>Prnp</i> <sup>Edbg/Edbg</sup>                                           | KO                               | 129/129                          | 129/129                          | 129/129                          | 129/129                          |
| <i>Prnp</i> <sup>GFP/GFP</sup>                                             | KO                               | 129/129                          | 129/129                          | 129/129                          | 129/129                          |
| <i>Prnp</i> <sup>Zrch1/Zrch1</sup>                                         | KO                               | 129/129                          | 129/129                          | 129/129                          | 129/129                          |
| B6.129- <i>Prnp</i> <sup>Zrch1/Zrch1</sup> <i>Sirpa</i> <sup>129/129</sup> | KO                               | 129/129                          | 129/129                          | 129/129                          | 129/129                          |
| B6.129- <i>Prnp</i> <sup>Zrch1/Zrch1</sup> <i>Sirpa</i> <sup>B6/B6</sup>   | KO                               | B6/B6                            | B6/B6                            | B6/B6                            | B6/B6                            |
| B6.129- <i>Prnp</i> <sup>wt/wt</sup> <i>Sirpa</i> <sup>129/129</sup>       | WT                               | 129/129                          | 129/129                          | 129/129                          | 129/129                          |
| B6.129- <i>Prnp</i> <sup>wt/wt</sup> <i>Sirpa</i> <sup>B6/B6</sup>         | WT                               | B6/B6                            | B6/B6                            | B6/B6                            | B6/B6                            |

**Table S4.** Primer sequences and restriction enzymes for RFLP analysis

| Name/marker ID                                                | Forward primer/primer 1            | Reverse primer/primer 2            | Restriction enzyme |
|---------------------------------------------------------------|------------------------------------|------------------------------------|--------------------|
| <b>For RFLP analysis of <i>Sirpa</i></b>                      |                                    |                                    |                    |
| RFLP <i>Sirpa</i> B6vs129                                     | 5'-CCGTTCTGAACTGCACCTTTG-3'        | 5'-GGGGTGACATTAAGTACACGG-3'        | AvaI               |
| RFLP <i>Sirpa</i> Cvs129                                      | 5'-ACAGAGGAGTAGGGCAAAGC-3'         | 5'-TAGGTACCGGCATCTTCTGG-3'         | XmnI               |
| <b>For RFLP analysis of <i>Tyro3</i></b>                      |                                    |                                    |                    |
| RFLP <i>Tyro3</i> B6vs129                                     | 5'-GGGATTAAGGATCCGGCCC-3'          | 5'-CACCTTCGACAGTGAGCCAT-3'         | HpyCH4III          |
| <b>For RFLP analysis of <i>Thbs1</i></b>                      |                                    |                                    |                    |
| RFLP <i>Thbs1</i> B6vs129                                     | 5'-CTTGGGGAAACTCCACACT-3'          | 5'-AAATCTTCCAGCCGATGTG-3'          | BseRI              |
| <b>For <i>Mertk</i> sequencing</b>                            |                                    |                                    |                    |
| <i>Mertk</i>                                                  | 5'-TGGTCTGCAGTAAGCCCTTG-3'         | 5'-AAGGTAAGCTCGATGGCTCG-3'         |                    |
| <b>For <i>Sirpa</i> ORF sequencing</b>                        |                                    |                                    |                    |
| <i>Sirpa-1</i>                                                | 5'-AGTCCACCTTAAGAGGACCAAGTAGC-3'   | 5'-TGTACAGAAACAGGACGCGGA-3'        |                    |
| <i>Sirpa-2</i>                                                | 5'-TCTCCCTCCTTGCTCTGCAG-3'         | 5'-TACCTCGCAGATGACCTTAGAATTAA-3'   |                    |
| <i>Sirpa-3</i>                                                | 5'-CCTAGTGGAAAGAATGTCTCCTACAACA-3' | 5'-CATATTCTGTGTGGTTGTTAGGCTCA-3'   |                    |
| <i>Sirpa-4</i>                                                | 5'-CCAGGTACAGTCTTTGATCCAGGA-3'     | 5'-CCAGGGAGTCTCTGCTGGTCTA-3'       |                    |
| <i>Sirpa-5</i>                                                | 5'-ACCCAGGTTGCGTCCTTGA-3'          | 5'-GTGGGTGGTTGCGCTGGCT-3'          |                    |
| <i>Sirpa-6</i>                                                | 5'-CCAATGCTGACCTAATGTTGGC-3'       | 5'-CATCTATACCCCGTGTGTATACACA-3'    |                    |
| <i>Sirpa-7</i>                                                | 5'-AACTGTCTTTGTCCGGGCC-3'          | 5'-GGCACAGTTCATCCTCACCC-3'         |                    |
| <b>For high-resolution microsatellite genotyping on Chr 2</b> |                                    |                                    |                    |
| D2Jyh582                                                      | 5'-ACTAAGCCCAACACAGCCTT-3'         | 5'-GCCTACCATATGCAAGACCC-3'         |                    |
| D2Jyh1192                                                     | 5'-TCTCTTTGACTTTACACATGC-3'        | 5'-CCCTGTGAGTGACAGAGGTATC-3'       |                    |
| D2Gul161                                                      | 5'-GTGGCTCTTTCTCCTGTTCC-3'         | 5'-GTATGCATGTATGTTTATGTGTGGT-3'    |                    |
| D2Gul169                                                      | 5'-TGCCTGAAGCTAACTACAGTGTAC-3'     | 5'-CATCATCATTATCAGAAGCATGTT-3'     |                    |
| D2Ngul1543                                                    | 5'-GATGTACAGAGGGCACTGCA-3'         | 5'-AGTCACCTATGTTGGATGTACCAC-3'     |                    |
| D2Ngul1586                                                    | 5'-ATGGGCTGATGATGTACA-3'           | 5'-AGGTCCACATCCATACAGCA-3'         |                    |
| D2Gul289                                                      | 5'-GGGAACTGACTTAGATCCTAAAAGT-3'    | 5'-CTGGCACACAACCC-3'               |                    |
| D2Ngul1677                                                    | 5'-ACCTCAAAGCAGAATCCTC-3'          | 5'-TCCACACTCTAAAGGGATCAAG-3'       |                    |
| D2Ngul1686                                                    | 5'-CTCGAGAGTACATACGCATGC-3'        | 5'-AGCAAGACACCTGATAGTACGTG-3'      |                    |
| D2Ngul1761                                                    | 5'-TGTGGAGCAGGTGACGTC-3'           | 5'-AGCCTCACCTCATGAAAGCT-3'         |                    |
| D2Ngul1797                                                    | 5'-TTTCCCCAAAACCAGCAT-3'           | 5'-GATTTCTTTCCATTCCCCAA-3'         |                    |
| D2Ngul1816                                                    | 5'-ACTGTTGTGGCCAAAATGG-3'          | 5'-CCTGCACAGTCTTTGTTGTTG-3'        |                    |
| D2Ngul1849                                                    | 5'-AGGTGAAGGTTATTTCTGGAC-3'        | 5'-CCAGGACAGCTTCTAGTAGTGTCT-3'     |                    |
| D2Ngul1865                                                    | 5'-TTAAACAGGAATCTTTCAACATTT-3'     | 5'-ATAAGCTGTGCTCTGGCCTT-3'         |                    |
| D2Ngul1888                                                    | 5'-ACCACTTCGATATCATTGGGA-3'        | 5'-GCCCTGCAAACACTAAATCA-3'         |                    |
| D2Ngul1937                                                    | 5'-GCTCATGTCCTTCCAAGAATG-3'        | 5'-GGGAAGAAGAGGAAGGAATTG-3'        |                    |
| D2Jyh2400                                                     | 5'-GCAATACCTCCAGCAATTTGT-3'        | 5'-CCATCCTACAAAAGTAATCCA-3'        |                    |
| D2Jyh2407                                                     | 5'-CAGTGAGACCTGTCTCAAAA-3'         | 5'-CTGCCTTCTAGAGCTGTCTT-3'         |                    |
| D2Gul374                                                      | 5'-ATGACTTAAGCATTTTAAAGCCAAA-3'    | 5'-CCCCCAACTTTAAACACA-3'           |                    |
| D2Gul399                                                      | 5'-CAGCAGGTAAGAGCCCTTG-3'          | 5'-TGAAATTATTTTTGTCCTTTTTTTGT-3'   |                    |
| D2Gul498                                                      | 5'-GACCCTGCAGATCTCAGCA-3'          | 5'-CATTTTTCTAATCATTTATGCTTATGTG-3' |                    |
