# Supplementary material for: SIRPα polymorphisms, but not the prion protein, control phagocytosis of apoptotic cells
Source: PubMed Central journal article supplement — J Exp Med. 2013 Nov 18;210(12):2539–52. doi: 10.1084/jem.20131274 (PMC3832919; doi:10.1084/jem.20131274), 2013-11-18
Supplement: supp_jem.20131274_JEM_20131274_TableS1.pdf [file supp_jem.20131274_JEM_20131274_TableS1.pdf]

**Table S1.** List of 305 differentially expressed genes identified by RNA-Seq ( $P < 0.05$ ), sorted byLog<sub>2</sub> fold change

| Gene                   | Locus                    | Mean FPKM WT | Mean FPKM KO | Log <sub>2</sub> fold change | P-value  | q-value  | Phag. <sup>1</sup> | SNPs <sup>2</sup> |
|------------------------|--------------------------|--------------|--------------|------------------------------|----------|----------|--------------------|-------------------|
| <b>Spint1</b>          | chr2:119237359-119249513 | 55.71        | 0.56         | -6.63                        | 0.00E+00 | 0.00E+00 | -                  | -                 |
| <b>Jmjd7</b>           | chr2:120027482-120032604 | 1.15         | 0.03         | -5.31                        | 4.13E-06 | 4.37E-04 | -                  | -                 |
| <b>Bub1b</b>           | chr2:118598210-118641592 | 2.15         | 0.1          | -4.47                        | 0.00E+00 | 0.00E+00 | -                  | -                 |
| <b>Gpr176</b>          | chr2:118277097-118373419 | 0.9          | 0.05         | -4.31                        | 2.55E-13 | 1.35E-10 | -                  | -                 |
| <b>Prnp</b>            | chr2:131909927-131938431 | 7.96         | 0.42         | -4.24                        | 0.00E+00 | 0.00E+00 | +                  | -                 |
| <b>Slc15a2</b>         | chr16:36750163-36784962  | 1.11         | 0.22         | -2.33                        | 6.35E-07 | 8.25E-05 | -                  | -                 |
| <b>Hpgds</b>           | chr6:65117292-65144730   | 0.78         | 0.18         | -2.13                        | 1.17E-06 | 1.39E-04 | -                  | -                 |
| <b>Mamdc2</b>          | chr19:23302608-23448322  | 0.7          | 0.17         | -2.06                        | 5.10E-06 | 5.25E-04 | -                  | -                 |
| <b>Cdo1</b>            | chr18:46713204-46728342  | 4.44         | 1.2          | -1.89                        | 1.34E-08 | 3.01E-06 | -                  | -                 |
| <b>Rhov</b>            | chr2:119269200-119271226 | 11.06        | 3.01         | -1.88                        | 3.11E-15 | 2.78E-12 | -                  | -                 |
| <b>Hpgd</b>            | chr8:56294551-56321046   | 4.1          | 1.27         | -1.69                        | 7.18E-08 | 1.19E-05 | -                  | -                 |
| <b>AA467197,Mir147</b> | chr2:122637886-122641076 | 7.7          | 2.4          | -1.68                        | 8.17E-06 | 7.66E-04 | -                  | -                 |
| <b>Gcnt1</b>           | chr19:17326140-17372844  | 10.23        | 3.57         | -1.52                        | 1.78E-15 | 1.72E-12 | -                  | -                 |
| <b>Arhgap22</b>        | chr14:33216822-33369936  | 1.81         | 0.64         | -1.5                         | 1.25E-05 | 1.11E-03 | -                  | -                 |
| <b>8430406107Rik</b>   | chr2:144271034-144281229 | 6.07         | 2.23         | -1.45                        | 1.95E-10 | 6.29E-08 | -                  | +                 |
| <b>Arhgap19</b>        | chr19:41766587-41802084  | 4.69         | 1.75         | -1.42                        | 1.02E-11 | 3.85E-09 | -                  | -                 |
| <b>Dkk2</b>            | chr3:132085291-132180304 | 3.76         | 1.44         | -1.38                        | 4.51E-09 | 1.12E-06 | -                  | -                 |
| <b>C1qc</b>            | chr4:136889801-136892914 | 286.23       | 114.96       | -1.32                        | 0.00E+00 | 0.00E+00 | +                  | -                 |
| <b>LOC100038947</b>    | chr3:15795146-15848487   | 8.92         | 3.65         | -1.29                        | 1.19E-07 | 1.89E-05 | -                  | +                 |
| <b>Gas6</b>            | chr8:13465373-13494535   | 2.37         | 0.98         | -1.27                        | 3.01E-05 | 2.27E-03 | +                  | -                 |
| <b>E2f2</b>            | chr4:136172393-136196056 | 0.74         | 0.31         | -1.26                        | 5.50E-04 | 2.61E-02 | -                  | -                 |
| <b>Rab3il1</b>         | chr19:10018227-10035586  | 4.85         | 2.05         | -1.25                        | 5.25E-07 | 7.11E-05 | -                  | -                 |
| <b>Cadm1</b>           | chr9:47530351-47853385   | 6.32         | 2.67         | -1.24                        | 2.05E-10 | 6.43E-08 | -                  | -                 |
| <b>Sirpb1b</b>         | chr3:15495753-15575065   | 3.26         | 1.4          | -1.22                        | 2.37E-04 | 1.29E-02 | -                  | -                 |
| <b>Ophn1</b>           | chrX:98557514-98890985   | 3.2          | 1.37         | -1.22                        | 2.14E-07 | 3.23E-05 | -                  | -                 |
| <b>Slc46a3</b>         | chr5:147878440-147894802 | 7.81         | 3.46         | -1.17                        | 3.12E-08 | 6.38E-06 | -                  | -                 |
| <b>Slc27a6</b>         | chr18:58556239-58612869  | 1.62         | 0.72         | -1.17                        | 5.82E-04 | 2.74E-02 | -                  | -                 |
| <b>C1qb</b>            | chr4:136880144-136886177 | 405.41       | 181.39       | -1.16                        | 1.53E-14 | 1.19E-11 | +                  | -                 |
| <b>Olfml3</b>          | chr3:103735393-103738001 | 14           | 6.3          | -1.15                        | 8.99E-09 | 2.14E-06 | -                  | -                 |
| <b>Apoc1</b>           | chr7:19689480-19692658   | 30.41        | 14.03        | -1.12                        | 4.29E-05 | 3.10E-03 | -                  | -                 |
| <b>Man2a2</b>          | chr7:80349096-80371375   | 14.1         | 6.5          | -1.12                        | 4.22E-14 | 3.07E-11 | -                  | -                 |

|                      |                           |        |        |       |          |          |   |   |
|----------------------|---------------------------|--------|--------|-------|----------|----------|---|---|
| <b>Spg11</b>         | chr2:122028582-122118386  | 8.82   | 4.1    | -1.1  | 2.39E-08 | 4.97E-06 | - | + |
| <b>Stard13</b>       | chr5:151037514-151190193  | 1.52   | 0.71   | -1.1  | 4.01E-04 | 1.99E-02 | - | - |
| <b>C1qa</b>          | chr4:136895915-136898844  | 324.73 | 152.9  | -1.09 | 2.27E-13 | 1.26E-10 | + | - |
| <b>Gm11710</b>       | chr11:115020727-115027012 | 31.73  | 14.95  | -1.09 | 6.85E-17 | 1.44E-15 | - | - |
| <b>Sepp1</b>         | chr15:3270766-3280508     | 139.37 | 66.18  | -1.07 | 1.47E-12 | 6.60E-10 | - | - |
| <b>Aif1</b>          | chr17:35170991-35176001   | 20.99  | 10.02  | -1.07 | 9.23E-07 | 1.13E-04 | + | - |
| <b>Enpp1</b>         | chr10:24641410-24712102   | 5.7    | 2.74   | -1.06 | 3.17E-07 | 4.67E-05 | - | - |
| <b>Fcgr4</b>         | chr1:171018925-171029761  | 4.7    | 2.26   | -1.05 | 8.21E-04 | 3.53E-02 | + | - |
| <b>Apcdd1</b>        | chr18:62922326-62953195   | 4.55   | 2.2    | -1.05 | 7.79E-06 | 7.60E-04 | - | - |
| <b>Rnf150</b>        | chr8:82863355-83091271    | 2.58   | 1.27   | -1.03 | 4.74E-08 | 8.36E-06 | - | - |
| <b>Tmem37</b>        | chr1:120067376-120073780  | 54.21  | 27.01  | -1.01 | 1.04E-09 | 2.95E-07 | - | - |
| <b>Apoc2</b>         | chr7:19671578-19676864    | 76.59  | 38.56  | -0.99 | 1.20E-08 | 2.73E-06 | - | - |
| <b>Cd300lh</b>       | chr11:115042130-115048295 | 24.25  | 12.33  | -0.98 | 7.95E-06 | 7.64E-04 | - | - |
| <b>Ms4a7</b>         | chr19:11321405-11336116   | 60.5   | 30.74  | -0.98 | 5.87E-08 | 9.91E-06 | - | - |
| <b>Siglec1</b>       | chr2:131069219-131086765  | 7.72   | 3.95   | -0.97 | 2.03E-09 | 5.24E-07 | - | - |
| <b>Ccr5</b>          | chr9:124121542-124127183  | 31.57  | 16.11  | -0.97 | 5.44E-11 | 1.86E-08 | + | - |
| <b>Arhgap15</b>      | chr2:43748823-44387623    | 4.98   | 2.57   | -0.95 | 2.39E-05 | 1.92E-03 | + | - |
| <b>Lgals1</b>        | chr15:78926724-78930465   | 52.22  | 27.08  | -0.95 | 3.51E-08 | 6.81E-06 | + | - |
| <b>Zfyve19</b>       | chr2:119172499-119217050  | 10.5   | 5.47   | -0.94 | 8.84E-06 | 8.04E-04 | - | + |
| <b>Lgmn</b>          | chr12:102394097-102439697 | 325.24 | 170.66 | -0.93 | 8.13E-09 | 1.97E-06 | - | - |
| <b>Egr1</b>          | chr18:34861206-34864956   | 3.5    | 1.83   | -0.93 | 1.28E-04 | 7.78E-03 | + | - |
| <b>Fos</b>           | chr12:85473900-85477270   | 9.36   | 4.99   | -0.91 | 6.93E-06 | 7.02E-04 | + | - |
| <b>Eif2ak4</b>       | chr2:118388616-118475234  | 7.03   | 3.86   | -0.86 | 6.65E-07 | 8.50E-05 | - | + |
| <b>BC055004</b>      | chr5:138225903-138251875  | 5.34   | 2.96   | -0.85 | 2.13E-04 | 1.19E-02 | - | - |
| <b>C530028O21Rik</b> | chr6:124996719-125003097  | 9.76   | 5.46   | -0.84 | 1.45E-04 | 8.60E-03 | - | - |
| <b>Sorl1</b>         | chr9:41968488-42124289    | 2.01   | 1.13   | -0.83 | 1.24E-04 | 7.65E-03 | - | - |
| <b>Enc1</b>          | chr13:97241104-97253040   | 10.23  | 5.76   | -0.83 | 1.82E-07 | 2.82E-05 | - | - |
| <b>Thbd</b>          | chr2:148404470-148408188  | 12.48  | 7.05   | -0.82 | 3.16E-07 | 4.67E-05 | - | - |
| <b>Fam125b</b>       | chr2:33729955-33887946    | 10.54  | 6.07   | -0.79 | 3.56E-07 | 5.05E-05 | - | - |
| <b>Igfbp4</b>        | chr11:99041259-99052643   | 9.82   | 5.7    | -0.79 | 7.61E-05 | 4.97E-03 | - | - |
| <b>Fam105a</b>       | chr15:27655070-27681542   | 11.69  | 6.77   | -0.79 | 1.32E-05 | 1.14E-03 | - | - |
| <b>Fabp4</b>         | chr3:10204342-10208576    | 380.32 | 221.92 | -0.78 | 4.69E-08 | 8.36E-06 | - | - |
| <b>Dock4</b>         | chr12:40446052-40846488   | 5.59   | 3.25   | -0.78 | 9.36E-07 | 1.13E-04 | - | - |
| <b>Stab1</b>         | chr14:31134852-31168641   | 25.8   | 15.06  | -0.78 | 1.10E-07 | 1.77E-05 | + | - |
| <b>Fcgr1</b>         | chr3:96282908-            | 17.19  | 10.12  | -0.76 | 2.15E-06 | 2.48E-04 | + | - |

|                   |                           |        |        |       |          |          |   |   |
|-------------------|---------------------------|--------|--------|-------|----------|----------|---|---|
|                   | 96293969                  |        |        |       |          |          |   |   |
| <b>Klra2</b>      | chr6:131219234-131247362  | 15.11  | 8.9    | -0.76 | 3.31E-05 | 2.46E-03 | - | - |
| <b>Daglb</b>      | chr5:143464492-143504442  | 23.16  | 13.85  | -0.74 | 5.73E-07 | 7.66E-05 | - | - |
| <b>Rasgrp3</b>    | chr17:75435904-75529053   | 10.9   | 6.51   | -0.74 | 2.65E-05 | 2.07E-03 | + | - |
| <b>Pld4</b>       | chr12:112760654-112768986 | 51.58  | 31.02  | -0.73 | 3.41E-07 | 4.89E-05 | + | - |
| <b>D14Ert449e</b> | chr14:25923297-25927672   | 6.2    | 3.72   | -0.73 | 4.61E-10 | 4.84E-09 | - | - |
| <b>Ms4a6c</b>     | chr19:11469367-11482196   | 80.23  | 49.42  | -0.7  | 2.63E-05 | 2.07E-03 | - | - |
| <b>Sh3bgrl2</b>   | chr9:83548337-83600291    | 9.41   | 5.81   | -0.69 | 4.81E-05 | 3.40E-03 | - | - |
| <b>Malat1</b>     | chr19:5795689-5802671     | 124.79 | 77.55  | -0.69 | 9.25E-04 | 3.85E-02 | - | - |
| <b>Zfp395</b>     | chr14:65358675-65398930   | 6.12   | 3.82   | -0.68 | 1.69E-04 | 9.85E-03 | - | - |
| <b>Mafb</b>       | chr2:160363676-160367065  | 107.2  | 67.27  | -0.67 | 6.93E-06 | 7.02E-04 | + | - |
| <b>Hgf</b>        | chr5:16553549-16619439    | 7.8    | 4.88   | -0.67 | 3.83E-04 | 1.92E-02 | + | - |
| <b>Mtus1</b>      | chr8:40990911-41133726    | 36.97  | 23.21  | -0.67 | 3.81E-06 | 4.14E-04 | - | - |
| <b>Abcc3</b>      | chr11:94343294-94392976   | 13.59  | 8.55   | -0.67 | 7.05E-06 | 7.08E-04 | - | - |
| <b>Gpcpd1</b>     | chr2:132529082-132578248  | 20.04  | 12.71  | -0.66 | 3.63E-05 | 2.67E-03 | - | - |
| <b>Fabp5</b>      | chr3:10012605-10016610    | 329.2  | 207.78 | -0.66 | 4.30E-06 | 4.47E-04 | - | - |
| <b>Engase</b>     | chr11:118476959-118489198 | 23.36  | 14.74  | -0.66 | 3.66E-06 | 4.01E-04 | - | - |
| <b>Arg1</b>       | chr10:24915206-24927470   | 321.13 | 204.41 | -0.65 | 1.17E-04 | 7.34E-03 | + | - |
| <b>Zdhhc14</b>    | chr17:5492599-5753891     | 6.52   | 4.16   | -0.65 | 8.07E-04 | 3.50E-02 | - | - |
| <b>Zranb3</b>     | chr1:127954185-128102408  | 5.04   | 3.24   | -0.63 | 6.94E-04 | 3.13E-02 | - | - |
| <b>Fry</b>        | chr5:150259929-150497753  | 4.46   | 2.88   | -0.63 | 5.10E-05 | 3.57E-03 | - | - |
| <b>Iqgap2</b>     | chr13:95627176-95891922   | 28.48  | 18.37  | -0.63 | 1.35E-05 | 1.16E-03 | - | - |
| <b>Cd244</b>      | chr1:171559192-171585316  | 5.69   | 3.7    | -0.62 | 1.04E-03 | 4.17E-02 | - | - |
| <b>Frm4b</b>      | chr6:97286866-97617657    | 12.44  | 8.11   | -0.62 | 3.18E-05 | 2.39E-03 | - | - |
| <b>Lair1</b>      | chr7:4007072-4063204      | 9.79   | 6.37   | -0.62 | 3.00E-04 | 1.57E-02 | - | - |
| <b>Maf</b>        | chr8:115703252-115706894  | 6.89   | 4.48   | -0.62 | 6.60E-04 | 3.02E-02 | + | - |
| <b>Sgsh</b>       | chr11:119314786-119355510 | 7.99   | 5.2    | -0.62 | 2.03E-04 | 1.14E-02 | - | - |
| <b>Rassf2</b>     | chr2:131992849-132029988  | 38.85  | 25.54  | -0.61 | 1.84E-05 | 1.53E-03 | - | - |
| <b>Clec12a</b>    | chr6:129350243-129365303  | 16.78  | 10.96  | -0.61 | 2.03E-04 | 1.14E-02 | - | - |
| <b>Mr1</b>        | chr1:155127877-155146780  | 9.38   | 6.18   | -0.6  | 1.04E-03 | 4.17E-02 | - | - |
| <b>Usp35</b>      | chr7:97309379-97325964    | 6.56   | 4.31   | -0.6  | 7.55E-04 | 3.35E-02 | - | - |
| <b>Ssh2</b>       | chr11:77216424-77460219   | 20.58  | 13.61  | -0.6  | 2.51E-05 | 2.00E-03 | - | - |
| <b>Epas1</b>      | chr17:86753863-86833410   | 10.55  | 6.95   | -0.6  | 6.78E-05 | 4.49E-03 | - | - |
| <b>Kif13b</b>     | chr14:64652530-64806296   | 11.4   | 7.58   | -0.59 | 6.46E-05 | 4.32E-03 | - | - |
| <b>Dhrs3</b>      | chr4:144892826-144927645  | 90.01  | 60.34  | -0.58 | 5.25E-05 | 3.66E-03 | - | - |

|                 |                           |        |        |       |          |          |   |   |
|-----------------|---------------------------|--------|--------|-------|----------|----------|---|---|
| <b>Per3</b>     | chr4:151003654-151044622  | 5.15   | 3.47   | -0.57 | 8.23E-04 | 3.53E-02 | - | - |
| <b>Tmem176b</b> | chr6:48833811-48841374    | 104.29 | 70.41  | -0.57 | 2.63E-04 | 1.40E-02 | - | - |
| <b>Ccl6</b>     | chr11:83582060-83623693   | 193.94 | 130.83 | -0.57 | 1.15E-04 | 7.27E-03 | - | - |
| <b>Bcl6</b>     | chr16:23965051-23988612   | 9.79   | 6.6    | -0.57 | 8.01E-04 | 3.49E-02 | - | - |
| <b>Dock10</b>   | chr1:80501072-80758553    | 10.38  | 7.08   | -0.55 | 1.22E-04 | 7.63E-03 | - | - |
| <b>C3ar1</b>    | chr6:122847139-122856157  | 134.63 | 91.83  | -0.55 | 6.86E-04 | 3.11E-02 | - | - |
| <b>Abca9</b>    | chr11:110100821-110168153 | 22.04  | 15.03  | -0.55 | 8.29E-05 | 5.39E-03 | - | - |
| <b>Gpr65</b>    | chr12:98268656-98276632   | 24.49  | 16.72  | -0.55 | 3.98E-04 | 1.99E-02 | - | - |
| <b>Abhd12</b>   | chr2:150832514-150904731  | 146.07 | 100.78 | -0.54 | 2.21E-04 | 1.22E-02 | - | - |
| <b>Plxnc1</b>   | chr10:94790865-94944578   | 10.01  | 6.86   | -0.54 | 1.84E-04 | 1.05E-02 | - | - |
| <b>Nav1</b>     | chr1:135434579-135585355  | 8.4    | 5.82   | -0.53 | 1.72E-04 | 9.87E-03 | + | - |
| <b>Adam8</b>    | chr7:139978940-139992488  | 88.42  | 61.22  | -0.53 | 2.67E-04 | 1.42E-02 | - | - |
| <b>Sesn1</b>    | chr10:41810573-41908436   | 30.62  | 21.26  | -0.53 | 6.15E-04 | 2.86E-02 | - | - |
| <b>Mctp1</b>    | chr13:76384960-77031810   | 9.16   | 6.35   | -0.53 | 1.04E-03 | 4.17E-02 | - | - |
| <b>Ldlrad3</b>  | chr2:101950200-102186377  | 15.15  | 10.6   | -0.52 | 6.08E-04 | 2.85E-02 | - | - |
| <b>Ptplad2</b>  | chr4:88412929-88438926    | 23.24  | 16.17  | -0.52 | 7.98E-04 | 3.49E-02 | - | - |
| <b>Tef</b>      | chr15:81802672-81826863   | 32.45  | 22.67  | -0.52 | 2.90E-04 | 1.53E-02 | - | - |
| <b>Slc37a2</b>  | chr9:37229148-37255738    | 16.55  | 11.59  | -0.51 | 4.45E-04 | 2.18E-02 | - | - |
| <b>Fasn</b>     | chr11:120805957-120824547 | 14.35  | 10.05  | -0.51 | 2.59E-04 | 1.39E-02 | - | - |
| <b>Itgb5</b>    | chr16:33829664-33949338   | 76.42  | 53.67  | -0.51 | 4.20E-04 | 2.06E-02 | + | - |
| <b>Nceh1</b>    | chr3:27183003-27244911    | 36.08  | 25.44  | -0.5  | 3.35E-04 | 1.72E-02 | - | - |
| <b>Atp8a1</b>   | chr5:67618140-67847431    | 7.14   | 5.03   | -0.5  | 8.69E-04 | 3.68E-02 | - | - |
| <b>Trpm2</b>    | chr10:77907721-77969872   | 6.93   | 4.9    | -0.5  | 1.08E-03 | 4.27E-02 | - | - |
| <b>Chd3</b>     | chr11:69344350-69369391   | 15.37  | 10.84  | -0.5  | 3.65E-04 | 1.85E-02 | - | - |
| <b>Vps13c</b>   | chr9:67840395-67995634    | 18.84  | 13.42  | -0.49 | 6.47E-04 | 3.00E-02 | - | - |
| <b>Nuak1</b>    | chr10:84371318-84440471   | 11.18  | 7.97   | -0.49 | 1.14E-03 | 4.45E-02 | - | - |
| <b>Ttyh3</b>    | chr5:140620577-140649031  | 37.81  | 27.35  | -0.47 | 9.03E-04 | 3.78E-02 | - | - |
| <b>Slc36a1</b>  | chr11:55204339-55236330   | 25.92  | 18.69  | -0.47 | 7.67E-04 | 3.38E-02 | - | - |
| <b>Abcd2</b>    | chr15:91145870-91191807   | 21.2   | 15.26  | -0.47 | 7.23E-04 | 3.22E-02 | - | - |
| <b>Rftn1</b>    | chr17:49993306-50190497   | 44.91  | 32.69  | -0.46 | 1.09E-03 | 4.30E-02 | - | - |
| <b>Entpd4</b>   | chr14:69337150-69366742   | 20.21  | 15.51  | -0.38 | 4.79E-06 | 3.36E-05 | - | - |
| <b>Zdhhc18</b>  | chr4:133606991-133633429  | 23.83  | 32.75  | 0.46  | 1.16E-03 | 4.52E-02 | - | - |
| <b>Zyx</b>      | chr6:42349827-42358395    | 63.95  | 88.08  | 0.46  | 1.12E-03 | 4.41E-02 | - | - |
| <b>Met</b>      | chr6:17463956-17573980    | 8.41   | 11.62  | 0.47  | 1.29E-03 | 4.96E-02 | - | - |
| <b>Sifn4</b>    | chr11:83175185-           | 14.27  | 19.84  | 0.47  | 9.49E-04 | 3.91E-02 | - | - |

|                      |                           |        |        |      |          |          |   |   |  |
|----------------------|---------------------------|--------|--------|------|----------|----------|---|---|--|
|                      | 83190216                  |        |        |      |          |          |   |   |  |
| <b>Gpr84</b>         | chr15:103308234-103310438 | 58.68  | 81.13  | 0.47 | 8.53E-04 | 3.64E-02 | - | - |  |
| <b>B430306N03Rik</b> | chr17:48316161-48326511   | 22.73  | 31.38  | 0.47 | 8.85E-04 | 3.72E-02 | - | - |  |
| <b>Slc2a6</b>        | chr2:27021364-27027998    | 32.1   | 44.68  | 0.48 | 8.51E-04 | 3.64E-02 | - | - |  |
| <b>Golim4</b>        | chr3:75876383-75956831    | 16.1   | 22.38  | 0.48 | 7.01E-04 | 3.15E-02 | - | - |  |
| <b>Oasl2</b>         | chr5:114896933-114912245  | 14.23  | 19.91  | 0.48 | 1.04E-03 | 4.17E-02 | - | - |  |
| <b>H2-Aa</b>         | chr17:34282750-34287771   | 59.85  | 83.2   | 0.48 | 9.30E-04 | 3.85E-02 | + | - |  |
| <b>Filip1l</b>       | chr16:57301999-57606867   | 13.4   | 18.78  | 0.49 | 1.05E-03 | 4.17E-02 | - | - |  |
| <b>Nfkb2</b>         | chr19:46304736-46327156   | 41.11  | 57.81  | 0.49 | 1.02E-03 | 4.14E-02 | - | - |  |
| <b>Sod2</b>          | chr17:13007838-13018119   | 100.16 | 143.55 | 0.52 | 8.78E-04 | 3.70E-02 | + | - |  |
| <b>Cd274</b>         | chr19:29367437-29388094   | 53.76  | 76.83  | 0.52 | 3.16E-04 | 1.64E-02 | - | - |  |
| <b>Vsig4</b>         | chrX:96247202-96293438    | 41.88  | 59.95  | 0.52 | 3.55E-04 | 1.80E-02 | - | - |  |
| <b>Smpd13b</b>       | chr4:132732965-132757171  | 33.27  | 48.05  | 0.53 | 1.88E-04 | 1.06E-02 | - | - |  |
| <b>Ampd3</b>         | chr7:110772603-110812395  | 66.32  | 95.89  | 0.53 | 3.54E-04 | 1.80E-02 | - | - |  |
| <b>Panx1</b>         | chr9:15005784-15045478    | 12.36  | 17.82  | 0.53 | 1.28E-03 | 4.95E-02 | - | - |  |
| <b>Prkar2b</b>       | chr12:31958478-32061279   | 25.5   | 36.91  | 0.53 | 1.33E-04 | 7.98E-03 | - | - |  |
| <b>Ephx1</b>         | chr1:180989555-181017495  | 106.75 | 155.25 | 0.54 | 1.68E-04 | 9.83E-03 | - | - |  |
| <b>Spp1</b>          | chr5:104435110-104441053  | 154.37 | 224.33 | 0.54 | 6.76E-04 | 3.07E-02 | + | - |  |
| <b>Rpl23</b>         | chr11:97777525-97782439   | 36.59  | 53.03  | 0.54 | 5.67E-04 | 2.68E-02 | - | - |  |
| <b>Id2</b>           | chr12:25093798-25096092   | 61.57  | 89.63  | 0.54 | 1.11E-04 | 7.03E-03 | - | - |  |
| <b>H2-Q4</b>         | chr17:35379616-35384674   | 65.04  | 94.87  | 0.54 | 9.06E-05 | 5.82E-03 | + | - |  |
| <b>Fpr1</b>          | chr17:17876470-17883939   | 38.8   | 56.46  | 0.54 | 2.23E-04 | 1.22E-02 | + | - |  |
| <b>Ptgr1</b>         | chr4:58965589-58987078    | 51.38  | 75.38  | 0.55 | 8.56E-05 | 5.54E-03 | - | - |  |
| <b>Ppfibp2</b>       | chr7:107595050-107758032  | 16.67  | 24.39  | 0.55 | 5.15E-04 | 2.46E-02 | - | - |  |
| <b>Egr2</b>          | chr10:67537868-67542188   | 62.34  | 91.31  | 0.55 | 1.27E-04 | 7.77E-03 | + | - |  |
| <b>Gbp6</b>          | chr5:105270701-105293699  | 6.33   | 9.31   | 0.56 | 4.73E-04 | 2.28E-02 | + | - |  |
| <b>Tln2</b>          | chr9:67217084-67559703    | 2.63   | 3.88   | 0.56 | 2.60E-04 | 1.39E-02 | - | - |  |
| <b>Rai14</b>         | chr15:10568977-10714631   | 23.72  | 35.28  | 0.57 | 3.95E-05 | 2.89E-03 | - | - |  |
| <b>Rpl7a</b>         | chr2:26910806-26913311    | 50.23  | 74.88  | 0.58 | 2.39E-04 | 1.29E-02 | - | - |  |
| <b>Dnajc10</b>       | chr2:80315465-80354055    | 74.19  | 110.68 | 0.58 | 1.42E-04 | 8.45E-03 | - | - |  |
| <b>Efnb2</b>         | chr8:8617438-8660773      | 15.15  | 22.58  | 0.58 | 4.48E-05 | 3.22E-03 | - | - |  |
| <b>Phldb1</b>        | chr9:44686307-44735198    | 9.39   | 14.03  | 0.58 | 5.46E-05 | 3.76E-03 | - | - |  |
| <b>Serpib9</b>       | chr13:33004540-33017955   | 16.73  | 25.02  | 0.58 | 4.66E-05 | 3.33E-03 | - | - |  |
| <b>Pfkip</b>         | chr13:6548156-6648724     | 22.54  | 33.61  | 0.58 | 6.59E-04 | 3.02E-02 | - | - |  |
| <b>Slc23a2</b>       | chr2:132052495-132145108  | 23.19  | 34.9   | 0.59 | 2.71E-05 | 2.10E-03 | - | - |  |

|                      |                           |        |        |      |          |          |   |   |
|----------------------|---------------------------|--------|--------|------|----------|----------|---|---|
| <b>5730494N06Rik</b> | chr2:132239491-132247788  | 19.39  | 29.1   | 0.59 | 9.23E-04 | 3.85E-02 | - | - |
| <b>Icam1</b>         | chr9:21015959-21028796    | 38.47  | 57.88  | 0.59 | 2.29E-05 | 1.87E-03 | + | - |
| <b>Procr</b>         | chr2:155751216-155755478  | 127.52 | 192.71 | 0.6  | 2.99E-05 | 2.27E-03 | - | - |
| <b>Bcam</b>          | chr7:19756137-19770532    | 6.68   | 10.15  | 0.6  | 1.01E-03 | 4.11E-02 | - | - |
| <b>Src</b>           | chr2:157424292-157471838  | 6.92   | 10.58  | 0.61 | 1.23E-04 | 7.63E-03 | + | - |
| <b>Tnfaip3</b>       | chr10:19000909-19015410   | 21.69  | 33.39  | 0.62 | 1.68E-05 | 1.41E-03 | - | - |
| <b>Tpm4</b>          | chr8:72135291-72153129    | 171.12 | 264.81 | 0.63 | 5.57E-05 | 3.79E-03 | - | - |
| <b>Abcc4</b>         | chr14:118482691-118706219 | 14.28  | 22.09  | 0.63 | 7.83E-06 | 7.60E-04 | - | - |
| <b>Pcx</b>           | chr19:4510471-4621752     | 7.35   | 11.37  | 0.63 | 6.41E-05 | 4.31E-03 | - | - |
| <b>Rpl36a</b>        | chrX:134585653-134588062  | 43.1   | 66.61  | 0.63 | 1.08E-03 | 4.27E-02 | - | - |
| <b>Gpr35</b>         | chr1:92973118-92986391    | 17     | 26.56  | 0.64 | 4.82E-05 | 3.40E-03 | - | - |
| <b>1500003O03Rik</b> | chr2:119547706-119587022  | 51.69  | 80.75  | 0.64 | 4.05E-06 | 4.36E-04 | - | - |
| <b>Gss</b>           | chr2:155563182-155592706  | 21.04  | 32.89  | 0.64 | 1.63E-05 | 1.38E-03 | - | - |
| <b>Car6</b>          | chr4:150187015-150201135  | 16.12  | 25.05  | 0.64 | 1.80E-04 | 1.03E-02 | - | - |
| <b>Rps12</b>         | chr10:23785182-23787209   | 60.69  | 94.26  | 0.64 | 2.42E-04 | 1.31E-02 | - | - |
| <b>Angptl2</b>       | chr2:33136972-33371478    | 11.27  | 17.67  | 0.65 | 2.63E-05 | 2.07E-03 | - | - |
| <b>Niacr1</b>        | chr5:123863569-123865516  | 6.17   | 9.7    | 0.65 | 1.02E-03 | 4.14E-02 | - | - |
| <b>Bcl2a1d</b>       | chr9:88723287-88731850    | 23.6   | 37.06  | 0.65 | 3.32E-04 | 1.71E-02 | - | - |
| <b>Dcbld2</b>        | chr16:58408534-58469745   | 3.71   | 5.82   | 0.65 | 6.08E-05 | 4.12E-03 | - | - |
| <b>Vmn2r26</b>       | chr6:124024757-124062035  | 9.25   | 14.57  | 0.66 | 6.90E-05 | 4.54E-03 | - | - |
| <b>Adora2a</b>       | chr10:75316942-75334788   | 9.36   | 14.79  | 0.66 | 6.65E-05 | 4.42E-03 | + | - |
| <b>Fpr2</b>          | chr17:17887823-17893952   | 31.46  | 49.64  | 0.66 | 1.24E-05 | 1.11E-03 | + | - |
| <b>Psma5</b>         | chr3:108256925-108279952  | 8.56   | 13.75  | 0.68 | 1.30E-03 | 4.96E-02 | - | - |
| <b>Rn4.5s</b>        | chr6:47654920-47655094    | 10.43  | 16.85  | 0.69 | 2.71E-03 | 1.42E-02 | - | - |
| <b>Rassf4</b>        | chr6:116633007-116673836  | 83.89  | 134.06 | 0.68 | 1.23E-04 | 7.63E-03 | - | - |
| <b>Dusp16</b>        | chr6:134715472-134792628  | 5.56   | 8.89   | 0.68 | 5.47E-05 | 3.76E-03 | - | - |
| <b>Chn2</b>          | chr6:54039931-54430221    | 7.18   | 11.69  | 0.7  | 4.97E-04 | 2.38E-02 | - | - |
| <b>Olr1</b>          | chr6:129485246-129507165  | 85.3   | 138.84 | 0.7  | 4.10E-06 | 4.37E-04 | + | - |
| <b>Slc7a2</b>        | chr8:40862366-40922070    | 86.04  | 140.17 | 0.7  | 1.46E-04 | 8.61E-03 | - | - |
| <b>Ahrr</b>          | chr13:74211117-74292309   | 5.68   | 9.2    | 0.7  | 1.31E-05 | 1.14E-03 | + | - |
| <b>Alas1</b>         | chr9:106233454-106247954  | 194.52 | 317.73 | 0.71 | 4.12E-05 | 3.00E-03 | - | - |
| <b>Dnmt3l</b>        | chr10:78030030-78063615   | 5.47   | 8.97   | 0.71 | 8.59E-04 | 3.65E-02 | - | - |
| <b>Slc22a23</b>      | chr13:34179157-34345182   | 1.53   | 2.49   | 0.71 | 6.62E-04 | 3.02E-02 | - | - |
| <b>Ets2</b>          | chr16:95702406-95721049   | 15.25  | 24.99  | 0.71 | 6.11E-07 | 8.08E-05 | - | - |
| <b>H2-Ab1</b>        | chr17:34263226-           | 69.92  | 114.49 | 0.71 | 4.33E-07 | 6.07E-05 | + | - |

|                      |                          |        |        |      |          |          |   |   |  |
|----------------------|--------------------------|--------|--------|------|----------|----------|---|---|--|
|                      | 34269418                 |        |        |      |          |          |   |   |  |
| <b>Gstm2</b>         | chr3:107981701-107986436 | 10.48  | 17.3   | 0.72 | 4.56E-04 | 2.21E-02 | - | - |  |
| <b>Slc28a2</b>       | chr2:122426476-122461130 | 2.33   | 3.88   | 0.73 | 4.63E-04 | 2.24E-02 | - | + |  |
| <b>Srxn1</b>         | chr2:152105729-152111353 | 226.13 | 374.61 | 0.73 | 2.93E-05 | 2.24E-03 | - | - |  |
| <b>Akr1b8</b>        | chr6:34354163-34368454   | 18.03  | 29.95  | 0.73 | 8.60E-06 | 7.94E-04 | - | - |  |
| <b>Ppip5k1</b>       | chr2:121289601-121351013 | 3.88   | 6.49   | 0.74 | 2.35E-05 | 1.90E-03 | - | + |  |
| <b>F3</b>            | chr3:121723536-121735052 | 6.42   | 10.69  | 0.74 | 1.71E-04 | 9.86E-03 | - | - |  |
| <b>A530064D06Rik</b> | chr17:48151895-48167257  | 18.11  | 30.27  | 0.74 | 3.23E-06 | 3.58E-04 | - | - |  |
| <b>Cyp1b1</b>        | chr17:79706952-79715041  | 10.5   | 17.5   | 0.74 | 6.38E-07 | 8.25E-05 | + | - |  |
| <b>Nfkbie</b>        | chr17:45555715-45563168  | 17.82  | 29.92  | 0.75 | 3.28E-07 | 4.77E-05 | - | - |  |
| <b>Ralgds</b>        | chr2:28513166-28553082   | 8.69   | 14.72  | 0.76 | 8.47E-06 | 7.88E-04 | + | - |  |
| <b>Cxcl14</b>        | chr13:56288642-56296551  | 63.47  | 107.74 | 0.76 | 5.62E-08 | 9.62E-06 | - | - |  |
| <b>Rpl12</b>         | chr2:32961711-32964045   | 16.87  | 28.82  | 0.77 | 3.67E-04 | 1.85E-02 | - | - |  |
| <b>Ppap2b</b>        | chr4:105157346-105232767 | 5.04   | 8.58   | 0.77 | 1.85E-05 | 1.53E-03 | - | - |  |
| <b>Ripk3</b>         | chr14:55784994-55788857  | 9.73   | 16.68  | 0.78 | 1.24E-05 | 1.11E-03 | - | - |  |
| <b>Rpl24</b>         | chr16:55966274-55971437  | 36.44  | 62.4   | 0.78 | 7.56E-06 | 7.46E-04 | - | - |  |
| <b>Plcb2</b>         | chr2:118707516-118728438 | 4.17   | 7.21   | 0.79 | 1.48E-06 | 1.74E-04 | - | + |  |
| <b>Cd53</b>          | chr3:106758860-106790149 | 233.15 | 402.03 | 0.79 | 1.48E-05 | 1.26E-03 | - | - |  |
| <b>Nqo1</b>          | chr8:107388224-107403205 | 71.95  | 124.92 | 0.8  | 1.48E-08 | 3.25E-06 | - | - |  |
| <b>Epha4</b>         | chr1:77367184-77515088   | 2.91   | 5.1    | 0.81 | 2.38E-06 | 2.69E-04 | - | - |  |
| <b>Dnm1</b>          | chr2:32308470-32353304   | 1.52   | 2.67   | 0.81 | 9.55E-04 | 3.93E-02 | - | - |  |
| <b>Vcan</b>          | chr13:89655309-89742512  | 2.54   | 4.45   | 0.81 | 5.55E-05 | 3.79E-03 | - | - |  |
| <b>Slc6a9</b>        | chr4:117835257-117872470 | 13.95  | 24.71  | 0.82 | 1.51E-08 | 3.25E-06 | - | - |  |
| <b>Socs2</b>         | chr10:95411489-95416857  | 6.58   | 11.66  | 0.82 | 1.26E-05 | 1.11E-03 | - | - |  |
| <b>Ltc4s</b>         | chr11:50236471-50238471  | 19.16  | 33.78  | 0.82 | 2.25E-04 | 1.23E-02 | - | - |  |
| <b>Pdgfb</b>         | chr15:79995875-80014808  | 14.97  | 26.5   | 0.82 | 2.08E-08 | 4.40E-06 | - | - |  |
| <b>Rcan1</b>         | chr16:92391952-92466146  | 28.14  | 49.59  | 0.82 | 4.14E-08 | 7.77E-06 | - | - |  |
| <b>Ifi205</b>        | chr1:174011997-174031755 | 3.27   | 5.82   | 0.83 | 8.10E-04 | 3.51E-02 | - | - |  |
| <b>Ly6i</b>          | chr15:74979811-74983430  | 11.27  | 20.06  | 0.83 | 1.30E-04 | 7.86E-03 | - | - |  |
| <b>Ass1</b>          | chr2:31470269-31520670   | 33.97  | 60.68  | 0.84 | 5.05E-07 | 6.91E-05 | - | - |  |
| <b>Rps27</b>         | chr3:90212666-90213648   | 54.11  | 96.93  | 0.84 | 2.19E-04 | 1.21E-02 | - | - |  |
| <b>1810029B16Rik</b> | chr8:66476345-66486507   | 33.27  | 59.54  | 0.84 | 3.21E-08 | 6.44E-06 | - | - |  |
| <b>H2-Q8</b>         | chr17:35394098-35395632  | 8.01   | 14.31  | 0.84 | 1.05E-04 | 6.68E-03 | + | - |  |
| <b>Ptges</b>         | chr2:30889470-30903297   | 34.17  | 61.47  | 0.85 | 1.79E-09 | 4.74E-07 | - | - |  |
| <b>Bcl2a1a</b>       | chr9:88956919-88962416   | 25.95  | 46.93  | 0.85 | 9.16E-07 | 1.13E-04 | - | - |  |

|                        |                           |        |         |      |          |          |   |   |
|------------------------|---------------------------|--------|---------|------|----------|----------|---|---|
| <b>Chst11</b>          | chr10:82985496-83195891   | 6.36   | 11.52   | 0.86 | 1.02E-08 | 2.36E-06 | - | - |
| <b>Gpr132</b>          | chr12:112850875-112860916 | 5.05   | 9.19    | 0.86 | 7.23E-06 | 7.19E-04 | - | - |
| <b>Susd2</b>           | chr10:75636618-75644008   | 1.43   | 2.61    | 0.87 | 1.15E-03 | 4.49E-02 | - | - |
| <b>Unc5b</b>           | chr10:60762594-60831581   | 4.08   | 7.52    | 0.88 | 3.42E-08 | 6.75E-06 | - | - |
| <b>Maff</b>            | chr15:79347677-79359076   | 2.77   | 5.11    | 0.88 | 7.08E-04 | 3.17E-02 | - | - |
| <b>Tmem119</b>         | chr5:113793728-113800352  | 6.4    | 11.84   | 0.89 | 2.34E-06 | 2.67E-04 | - | - |
| <b>Trem14</b>          | chr17:48264294-48275358   | 4.28   | 7.91    | 0.89 | 6.55E-04 | 3.02E-02 | - | - |
| <b>Malt1</b>           | chr18:65430996-65478792   | 13.06  | 24.17   | 0.89 | 5.32E-10 | 1.59E-07 | + | - |
| <b>Cxcl2</b>           | chr5:90903898-90905938    | 23.05  | 42.88   | 0.9  | 4.65E-08 | 8.36E-06 | + | - |
| <b>Igf2bp1,Mir3063</b> | chr11:95957163-96005944   | 0.76   | 1.41    | 0.9  | 1.28E-04 | 7.78E-03 | - | - |
| <b>Tnfsf4</b>          | chr1:161395437-161418206  | 11.53  | 21.78   | 0.92 | 1.24E-07 | 1.94E-05 | - | - |
| <b>Cish</b>            | chr9:107296688-107301961  | 4.15   | 7.87    | 0.92 | 1.30E-05 | 1.14E-03 | - | - |
| <b>Nckap1</b>          | chr2:80501294-80580965    | 1.31   | 2.49    | 0.93 | 4.03E-04 | 2.00E-02 | - | - |
| <b>Clec5a</b>          | chr6:40529090-40910666    | 31.79  | 60.8    | 0.94 | 3.82E-11 | 1.35E-08 | - | - |
| <b>Hspa1a</b>          | chr17:34969358-34972156   | 1.93   | 3.69    | 0.94 | 1.67E-04 | 9.81E-03 | - | - |
| <b>Pf4</b>             | chr5:90772434-90773383    | 600.2  | 1159.14 | 0.95 | 1.55E-09 | 4.18E-07 | + | - |
| <b>Gbp2</b>            | chr3:142620662-142638008  | 22.24  | 43.92   | 0.98 | 4.25E-12 | 1.70E-09 | - | - |
| <b>Dcstamp</b>         | chr15:39745931-39760934   | 4.93   | 9.74    | 0.98 | 2.00E-06 | 2.33E-04 | - | - |
| <b>Chac1</b>           | chr2:119351241-119354327  | 4.96   | 9.88    | 0.99 | 8.08E-06 | 7.66E-04 | - | + |
| <b>H2-Q7</b>           | chr17:35439154-35443773   | 58.39  | 116.36  | 0.99 | 7.50E-10 | 2.18E-07 | + | - |
| <b>Gpr68</b>           | chr12:100876681-100908198 | 7.64   | 15.24   | 1    | 4.35E-08 | 8.03E-06 | - | - |
| <b>Il1a</b>            | chr2:129297369-129309972  | 19.27  | 39.18   | 1.02 | 6.01E-12 | 2.33E-09 | + | - |
| <b>Layn</b>            | chr9:51056779-51077094    | 10.93  | 22.12   | 1.02 | 1.37E-09 | 3.79E-07 | - | - |
| <b>Rasgrp1</b>         | chr2:117279992-117342877  | 0.46   | 0.94    | 1.04 | 1.23E-03 | 4.76E-02 | - | - |
| <b>Irg1</b>            | chr14:103047011-103056573 | 43.81  | 92.61   | 1.08 | 1.24E-14 | 1.03E-11 | - | - |
| <b>Il1b</b>            | chr2:129364579-129375733  | 25.65  | 54.76   | 1.09 | 5.89E-13 | 2.86E-10 | + | - |
| <b>Nnt</b>             | chr13:119334316-119409138 | 8.59   | 18.32   | 1.09 | 6.66E-13 | 3.10E-10 | + | - |
| <b>H2-Q6</b>           | chr17:35424876-35428361   | 32.54  | 69.21   | 1.09 | 2.29E-12 | 9.86E-10 | + | - |
| <b>A130040M12Rik</b>   | chr13:68233964-68450346   | 0.85   | 1.82    | 1.1  | 3.28E-04 | 1.69E-02 | - | - |
| <b>Heph</b>            | chrX:96455435-96574484    | 6.08   | 13.13   | 1.11 | 3.44E-11 | 1.25E-08 | - | - |
| <b>Csf1</b>            | chr3:107741047-107760469  | 21.98  | 48.32   | 1.14 | 1.75E-13 | 1.07E-10 | + | - |
| <b>Il20rb</b>          | chr9:100457718-100486473  | 4.52   | 9.97    | 1.14 | 3.12E-09 | 7.89E-07 | - | - |
| <b>Clec4e</b>          | chr6:123281788-123289871  | 224.77 | 506.54  | 1.17 | 9.20E-11 | 3.06E-08 | - | - |
| <b>Hspa1b</b>          | chr17:34956428-34959238   | 1.85   | 4.15    | 1.17 | 2.55E-06 | 2.85E-04 | - | - |
| <b>Adora2b</b>         | chr11:62248983-           | 1.99   | 4.53    | 1.18 | 2.82E-05 | 2.17E-03 | - | - |



|                    | 62266452                 |        |        |      |          |          |   |   |  |
|--------------------|--------------------------|--------|--------|------|----------|----------|---|---|--|
| <b>Serpinb1a</b>   | chr13:32842091-32851185  | 10.6   | 24.52  | 1.21 | 3.18E-13 | 1.61E-10 | - | - |  |
| <b>Plcb1</b>       | chr2:134786163-135475258 | 0.92   | 2.15   | 1.22 | 9.88E-08 | 1.62E-05 | - | - |  |
| <b>Traf1</b>       | chr2:34943257-34961772   | 2.41   | 5.65   | 1.23 | 1.99E-07 | 3.05E-05 | - | + |  |
| <b>Il1rn</b>       | chr2:24336859-24351491   | 23.96  | 56.97  | 1.25 | 0.00E+00 | 0.00E+00 | + | - |  |
| <b>Amotl1</b>      | chr9:14541966-14615000   | 0.49   | 1.17   | 1.26 | 8.58E-07 | 1.07E-04 | - | - |  |
| <b>Cdc42ep2</b>    | chr19:5917555-5924816    | 2.45   | 5.86   | 1.26 | 8.14E-06 | 7.66E-04 | - | - |  |
| <b>Flrt3</b>       | chr2:140395429-142390050 | 4.36   | 10.49  | 1.27 | 2.38E-12 | 9.89E-10 | - | - |  |
| <b>Abcb4</b>       | chr5:8893720-8959226     | 0.84   | 2.05   | 1.28 | 4.30E-06 | 4.47E-04 | - | - |  |
| <b>Dynlt1a</b>     | chr17:6310544-6317474    | 2.49   | 6.06   | 1.29 | 4.49E-04 | 2.19E-02 | - | - |  |
| <b>Nfatc4</b>      | chr14:55824794-55833943  | 0.91   | 2.31   | 1.34 | 3.31E-05 | 2.46E-03 | - | - |  |
| <b>Cxcl3</b>       | chr5:90786102-90788090   | 66.88  | 174.46 | 1.38 | 0.00E+00 | 0.00E+00 | - | - |  |
| <b>Mtap1a</b>      | chr2:121289601-121351013 | 0.32   | 0.88   | 1.44 | 1.70E-04 | 9.86E-03 | - | + |  |
| <b>Six1</b>        | chr12:73041826-73046712  | 1.2    | 3.47   | 1.53 | 3.81E-08 | 7.27E-06 | - | - |  |
| <b>Col18a1</b>     | chr10:77052178-77166530  | 8.82   | 26.31  | 1.58 | 0.00E+00 | 0.00E+00 | - | - |  |
| <b>Gatm</b>        | chr2:122594472-122611277 | 27.46  | 85.13  | 1.63 | 0.00E+00 | 0.00E+00 | - | - |  |
| <b>Ccl24</b>       | chr5:135569936-135573043 | 100.51 | 318.64 | 1.66 | 0.00E+00 | 0.00E+00 | - | - |  |
| <b>Tmc3</b>        | chr7:83584930-83623709   | 0.23   | 0.74   | 1.67 | 2.30E-05 | 1.87E-03 | - | - |  |
| <b>Osmr</b>        | chr15:6813576-6874313    | 0.08   | 0.24   | 1.69 | 1.22E-03 | 4.72E-02 | - | - |  |
| <b>Artn</b>        | chr4:117926161-117929763 | 1.51   | 5.18   | 1.78 | 2.28E-10 | 6.99E-08 | - | - |  |
| <b>Six4</b>        | chr12:73100258-73113245  | 0.08   | 0.28   | 1.78 | 3.07E-04 | 1.60E-02 | - | - |  |
| <b>Ccl22</b>       | chr8:94745683-94751388   | 0.57   | 2.17   | 1.94 | 1.10E-06 | 1.32E-04 | + | - |  |
| <b>Thy1</b>        | chr9:44043383-44048579   | 0.14   | 0.58   | 2.06 | 7.58E-04 | 3.35E-02 | - | - |  |
| <b>Atp8b1</b>      | chr18:64528978-64661000  | 0.09   | 0.41   | 2.27 | 4.60E-07 | 6.38E-05 | - | - |  |
| <b>Dynlt1b</b>     | chr17:6430111-6436295    | 2.89   | 14.91  | 2.36 | 2.08E-13 | 1.21E-10 | - | - |  |
| <b>Clu</b>         | chr14:65968482-65981545  | 0.05   | 0.42   | 3.14 | 4.10E-04 | 2.02E-02 | - | - |  |
| <b>Exd1</b>        | chr2:119519403-119547627 | 0.06   | 0.57   | 3.25 | 4.83E-08 | 8.38E-06 | - | + |  |
| <b>Gchfr</b>       | chr2:119167787-119172389 | 0.13   | 1.33   | 3.37 | 7.97E-04 | 3.49E-02 | - | - |  |
| <b>Cd163l1</b>     | chr7:140218266-140231145 | 0.03   | 0.34   | 3.58 | 8.76E-06 | 8.03E-04 | - | - |  |
| <b>Tmem181b-ps</b> | chr17:6439001-6450994    | 0.39   | 5.6    | 3.84 | 0.00E+00 | 0.00E+00 | - | - |  |
| <b>Gm14085</b>     | chr2:122484940-122528040 | 0.05   | 1.04   | 4.48 | 1.63E-13 | 1.06E-10 | - | - |  |
| <b>Sfrp2</b>       | chr3:83766320-83774314   | 0      | 1.11   | 7.79 | 9.95E-04 | 4.08E-02 | - | - |  |
| <b>Rpl31-ps12</b>  | chr16:16753015-16829363  | 0.37   | 146.86 | 8.64 | 0.00E+00 | 0.00E+00 | - | - |  |

FPKM, fragments per kilobase of exon per million fragments mapped. In yellow are genes located on chromosome 2. Note that chromosome 2 contains significantly more differentially expressed genes (P

based on Z score [ $Z > 44$ ] = 0.0011, corrected for chromosome size). This clustering is even more pronounced when considering the highly differentially expressed genes (absolute  $\text{Log}_2$  fold change  $> 1$ ) and correcting for chromosome size (P based on Z score [ $Z > 29$ ] = 0.00039).

<sup>1</sup>Involved in phagocytosis, if retrievable records on pubmed.gov using the search terms “gene xy phagocytosis”, and/or associated terms on geneontology.org, using unfiltered search parameters and considering all recorded species.

<sup>2</sup>Containing nonsynonymous SNPs between B6.129-Prnp<sup>wt/wt</sup> and B6.129-Prnp<sup>Zrch1/Zrch1</sup> pMΦs.
