# Supplementary material for: SIRPα polymorphisms, but not the prion protein, control phagocytosis of apoptotic cells
Source: PubMed Central journal article supplement — J Exp Med. 2013 Nov 18;210(12):2539–52. doi: 10.1084/jem.20131274 (PMC3832919; doi:10.1084/jem.20131274), 2013-11-18
Supplement: supp_jem.20131274_JEM_20131274_TableS2.pdf [file supp_jem.20131274_JEM_20131274_TableS2.pdf]

**Table S2.** Genes containing nonsynonymous SNPs between B6.129-*Prnp*<sup>wt/wt</sup> and B6.129-*Prnp*<sup>Zrchl/Zrchl</sup> peritoneal macrophages sorted by chromosome location

| Gene                  | Locus                    | Mean FPKM WT | Mean FPKM KO | Log <sub>2</sub> fold change | P-value  | q-value  | Diff. expr. <sup>1</sup> | Phag. <sup>2</sup> |
|-----------------------|--------------------------|--------------|--------------|------------------------------|----------|----------|--------------------------|--------------------|
| <i>Ppfia4</i>         | chr1:134296782-134332928 | 4.27         | 3.46         | -0.30                        | 0.08     | 0.83     | -                        | -                  |
| <i>Cacna1s</i>        | chr1:136052900-136119822 | 0.01         | 0.01         | 0.03                         | 0.99     | 1.00     | -                        | -                  |
| <i>Atp1a4</i>         | chr1:172223507-172258424 | 0.00         | 0.00         | 0.00                         | 1.00     | 1.00     | -                        | -                  |
| <i>Mgat4a</i>         | chr1:37439339-37536259   | 43.39        | 42.94        | -0.01                        | 0.92     | 1.00     | -                        | -                  |
| <i>A530032D15Rik</i>  | chr1:85088138-85109853   | 0.49         | 0.45         | -0.10                        | 0.83     | 1.00     | -                        | -                  |
| <i>Heatr7b1</i>       | chr1:88227019-88277579   | 0.11         | 0.08         | -0.51                        | 0.67     | 1.00     | -                        | -                  |
| <i>B230118H07Rik</i>  | chr2:101560780-101632528 | 3.39         | 3.73         | 0.14                         | 0.57     | 1.00     | -                        | -                  |
| <i>Hipk3, Mir1902</i> | chr2:104426481-104494489 | 26.64        | 26.82        | 0.01                         | 0.94     | 1.00     | -                        | -                  |
| <i>Qser1</i>          | chr2:104754796-104816696 | 4.17         | 3.73         | -0.16                        | 0.30     | 1.00     | -                        | -                  |
| <i>Thbs1</i>          | chr2:118111921-118127133 | 707.41       | 365.26       | -0.95                        | 3.31E-03 | 0.10     | -                        | +                  |
| <i>Eif2ak4</i>        | chr2:118388616-118475234 | 7.03         | 3.86         | -0.86                        | 6.65E-07 | 8.50E-05 | +                        | -                  |
| <i>Plcb2</i>          | chr2:118707516-118728438 | 4.17         | 7.21         | 0.79                         | 1.48E-06 | 1.74E-04 | +                        | -                  |
| <i>Bahd1</i>          | chr2:118901614-118924524 | 10.46        | 10.71        | 0.03                         | 0.82     | 1.00     | -                        | -                  |
| <i>Chst14</i>         | chr2:118926496-118928583 | 7.12         | 7.03         | -0.02                        | 0.93     | 1.00     | -                        | -                  |
| <i>Rpusd2</i>         | chr2:119034789-119042197 | 1.15         | 1.09         | -0.07                        | 0.78     | 1.00     | -                        | -                  |
| <i>Fam82a2</i>        | chr2:119136997-119157034 | 10.50        | 12.22        | 0.22                         | 0.20     | 1.00     | -                        | -                  |
| <i>Zfyve19</i>        | chr2:119172499-119217050 | 10.50        | 5.47         | -0.94                        | 8.84E-06 | 8.04E-04 | +                        | -                  |
| <i>Chac1</i>          | chr2:119351241-119354327 | 4.96         | 9.88         | 0.99                         | 8.08E-06 | 7.66E-04 | +                        | -                  |
| <i>Exd1</i>           | chr2:119519403-119547627 | 0.06         | 0.57         | 3.25                         | 4.83E-08 | 8.38E-06 | +                        | -                  |
| <i>Ndufaf1</i>        | chr2:119655450-119662798 | 5.66         | 5.75         | 0.02                         | 0.93     | 1.00     | -                        | -                  |
| <i>Rtf1</i>           | chr2:119675067-119735407 | 9.52         | 10.03        | 0.08                         | 0.61     | 1.00     | -                        | -                  |
| <i>Rpap1</i>          | chr2:119763958-119787537 | 4.26         | 3.87         | -0.14                        | 0.51     | 1.00     | -                        | -                  |
| <i>Tyro3</i>          | chr2:119799513-119818103 | 0.26         | 0.36         | 0.46                         | 0.28     | 1.00     | -                        | +                  |
| <i>Mga</i>            | chr2:119897227-119969581 | 7.33         | 7.19         | -0.03                        | 0.85     | 1.00     | -                        | -                  |
| <i>Mapkbp1</i>        | chr2:119972698-120027403 | 2.70         | 2.28         | -0.24                        | 0.19     | 1.00     | -                        | -                  |
| <i>Ganc</i>           | chr2:120355308-120504919 | 2.61         | 3.00         | 0.20                         | 0.50     | 1.00     | -                        | -                  |
| <i>Tmem87a</i>        | chr2:120355309-120404116 | 12.40        | 17.40        | 0.49                         | 2.91E-03 | 0.09     | -                        | -                  |
| <i>Zfp106</i>         | chr2:120506829-120563831 | 30.17        | 29.02        | -0.06                        | 0.70     | 1.00     | -                        | -                  |
| <i>Cdan1</i>          | chr2:120716153-120731517 | 3.37         | 2.83         | -0.25                        | 0.16     | 1.00     | -                        | -                  |
| <i>Ttbk2</i>          | chr2:120732816-120850584 | 1.95         | 2.07         | 0.09                         | 0.63     | 1.00     | -                        | -                  |
| <i>Ubr1</i>           | chr2:120850655-120970715 | 7.22         | 6.91         | -0.06                        | 0.66     | 1.00     | -                        | -                  |
| <i>Tmem62</i>         | chr2:120977061-121007842 | 9.92         | 9.71         | -0.03                        | 0.85     | 1.00     | -                        | -                  |
| <i>Lcmt2</i>          | chr2:121137291-121140698 | 4.63         | 3.57         | -0.37                        | 0.06     | 0.72     | -                        | -                  |
| <i>Adal</i>           | chr2:121142140-          | 4.12         | 5.20         | 0.34                         | 0.12     | 1.00     | -                        | -                  |

|                      |                          |         |         |       |          |          |   |   |  |
|----------------------|--------------------------|---------|---------|-------|----------|----------|---|---|--|
|                      | 121156678                |         |         |       |          |          |   |   |  |
| <b>Zscan29</b>       | chr2:121157426-121171149 | 7.73    | 8.38    | 0.12  | 0.42     | 1.00     | - | - |  |
| <b>Trp53bp1</b>      | chr2:121196727-121271386 | 6.43    | 6.16    | -0.06 | 0.76     | 1.00     | - | - |  |
| <b>Mtap1a</b>        | chr2:121289601-121351013 | 0.32    | 0.88    | 1.44  | 1.70E-04 | 0.01     | + | - |  |
| <b>Ppip5k1</b>       | chr2:121310561-121351013 | 3.88    | 6.49    | 0.74  | 2.35E-05 | 1.90E-03 | + | - |  |
| <b>Wdr76</b>         | chr2:121506722-121544859 | 1.23    | 1.56    | 0.35  | 0.19     | 1.00     | - | - |  |
| <b>Spg11</b>         | chr2:122053526-122118386 | 8.82    | 4.10    | -1.10 | 2.39E-08 | 4.97E-06 | + | - |  |
| <b>B2m</b>           | chr2:122120107-122186189 | 3019.43 | 2916.05 | -0.05 | 0.84     | 1.00     | - | - |  |
| <b>Slc28a2</b>       | chr2:122426476-122461130 | 2.33    | 3.88    | 0.73  | 4.63E-04 | 0.02     | + | - |  |
| <b>Slc30a4</b>       | chr2:122681238-122702663 | 4.89    | 4.35    | -0.17 | 0.32     | 1.00     | - | - |  |
| <b>Pldn</b>          | chr2:122738504-122749487 | 9.33    | 11.75   | 0.33  | 0.03     | 0.49     | - | - |  |
| <b>Sqrdl</b>         | chr2:122765358-122809551 | 94.96   | 122.34  | 0.37  | 0.01     | 0.24     | - | - |  |
| <b>Usp8</b>          | chr2:126707327-126759314 | 38.70   | 36.02   | -0.10 | 0.47     | 1.00     | - | - |  |
| <b>2010106G01Rik</b> | chr2:126890394-126933235 | 60.17   | 68.69   | 0.19  | 0.21     | 1.00     | - | - |  |
| <b>Stard7</b>        | chr2:127270228-127298934 | 15.21   | 14.40   | -0.08 | 0.60     | 1.00     | - | - |  |
| <b>Mertk</b>         | chr2:128698996-128802188 | 45.87   | 44.28   | -0.05 | 0.72     | 1.00     | - | + |  |
| <b>Polr1b</b>        | chr2:129100995-129126595 | 4.97    | 4.75    | -0.06 | 0.72     | 1.00     | - | - |  |
| <b>Ckap2l</b>        | chr2:129268209-129297212 | 0.35    | 0.37    | 0.06  | 0.88     | 1.00     | - | - |  |
| <b>Sirpa</b>         | chr2:129592838-129632228 | 356.34  | 375.60  | 0.08  | 0.73     | 1.00     | - | + |  |
| <b>Vps16</b>         | chr2:130417683-130444269 | 14.78   | 13.95   | -0.08 | 0.63     | 1.00     | - | - |  |
| <b>Fam113a</b>       | chr2:130417684-130424641 | 5.37    | 7.02    | 0.39  | 0.14     | 1.00     | - | - |  |
| <b>1110034G24Rik</b> | chr2:132690282-132751055 | 7.69    | 6.97    | -0.14 | 0.52     | 1.00     | - | - |  |
| <b>Trmt6</b>         | chr2:132804214-132816054 | 9.42    | 8.63    | -0.13 | 0.45     | 1.00     | - | - |  |
| <b>Mkks</b>          | chr2:136873781-136891406 | 8.87    | 8.21    | -0.11 | 0.55     | 1.00     | - | - |  |
| <b>Rrbp1</b>         | chr2:143947394-144011263 | 68.09   | 60.61   | -0.17 | 0.29     | 1.00     | - | - |  |
| <b>8430406I07Rik</b> | chr2:144271034-144281229 | 6.07    | 2.23    | -1.45 | 1.95E-10 | 6.29E-08 | + | - |  |
| <b>Rin2</b>          | chr2:145786115-145887616 | 62.96   | 49.07   | -0.36 | 0.01     | 0.29     | - | - |  |
| <b>Fam110a</b>       | chr2:151969397-151980219 | 6.05    | 5.31    | -0.19 | 0.41     | 1.00     | - | - |  |
| <b>Slc52a3</b>       | chr2:151996510-152009258 | 0.60    | 0.87    | 0.54  | 0.17     | 1.00     | - | - |  |
| <b>Zcchc3</b>        | chr2:152411955-152415044 | 1.78    | 1.65    | -0.11 | 0.70     | 1.00     | - | - |  |
| <b>Rem1</b>          | chr2:152627007-152635191 | 0.69    | 0.99    | 0.52  | 0.23     | 1.00     | - | - |  |
| <b>H13</b>           | chr2:152669460-152708668 | 20.03   | 19.08   | -0.07 | 0.72     | 1.00     | - | - |  |
| <b>Prex1</b>         | chr2:166566344-166713832 | 32.51   | 31.06   | -0.07 | 0.64     | 1.00     | - | - |  |
| <b>Gm14393</b>       | chr2:175061548-175067763 | 0.30    | 0.56    | 0.89  | 0.25     | 1.00     | - | - |  |
| <b>Traf1</b>         | chr2:34943257-34961772   | 2.41    | 5.65    | 1.23  | 1.99E-07 | 3.05E-05 | + | - |  |
| <b>LOC100038947</b>  | chr3:15795146-15848487   | 8.92    | 3.65    | -1.29 | 1.19E-07 | 1.89E-05 | + | - |  |
| <b>Srsf11</b>        | chr3:158010492-158036639 | 24.25   | 24.62   | 0.02  | 0.88     | 1.00     | - | - |  |
| <b>Pip5k1a</b>       | chr3:95059595-95106858   | 12.33   | 13.67   | 0.15  | 0.35     | 1.00     | - | - |  |

|                      |                           |        |        |           |      |      |   |   |
|----------------------|---------------------------|--------|--------|-----------|------|------|---|---|
| <b>2010305A19Rik</b> | chr4:108328151-108340718  | 4.13   | 4.13   | 0.00      | 1.00 | 1.00 | - | - |
| <b>Aldoart1</b>      | chr4:72850582-72852634    | 13.44  | 14.33  | 0.09      | 0.58 | 1.00 | - | - |
| <b>Gbp11</b>         | chr5:105323025-105346472  | 0.14   | 0.15   | 0.10      | 0.87 | 1.00 | - | - |
| <b>Fam20c</b>        | chr5:138755080-138810063  | 171.49 | 194.08 | 0.18      | 0.28 | 1.00 | - | - |
| <b>Smurf1</b>        | chr5:144876494-144965830  | 17.12  | 18.87  | 0.14      | 0.33 | 1.00 | - | - |
| <b>Fam193a</b>       | chr5:34369932-34486458    | 7.19   | 7.21   | 0.00      | 0.98 | 1.00 | - | - |
| <b>Igbp1b</b>        | chr6:138657091-138658444  | 0.00   | 0.00   | 0.00      | 1.00 | 1.00 | - | - |
| <b>4930544G11Rik</b> | chr6:65952570-65954014    | 0.00   | 0.00   | 0.00      | 1.00 | 1.00 | - | - |
| <b>4931417E11Rik</b> | chr6:73468572-73469667    | 0.00   | 0.00   | 0.00      | 1.00 | 1.00 | - | - |
| <b>Plxna1</b>        | chr6:89316313-89362613    | 38.42  | 36.78  | -0.06     | 0.68 | 1.00 | - | - |
| <b>Iqsec1</b>        | chr6:90659597-90810123    | 18.34  | 16.96  | -0.11     | 0.42 | 1.00 | - | + |
| <b>Atp2a1</b>        | chr7:126428766-126463073  | 0.03   | 0.05   | 0.88      | 0.69 | 1.00 | - | - |
| <b>Btbd1</b>         | chr7:81792073-81829431    | 11.13  | 12.06  | 0.12      | 0.46 | 1.00 | - | - |
| <b>Fut10</b>         | chr8:31187331-31261483    | 5.00   | 4.68   | -0.10     | 0.68 | 1.00 | - | - |
| <b>Sugp1</b>         | chr8:70042812-70071953    | 12.57  | 11.95  | -0.07     | 0.66 | 1.00 | - | - |
| <b>Pde4c</b>         | chr8:70724063-70751176    | 0.00   | 0.01   | 1.80e+308 | 0.16 | 1.00 | - | - |
| <b>Mast1</b>         | chr8:84911852-84937353    | 1.75   | 1.55   | -0.18     | 0.45 | 1.00 | - | - |
| <b>Gnat1</b>         | chr9:107674473-107679592  | 0.02   | 0.02   | 0.11      | 0.95 | 1.00 | - | - |
| <b>Mre11a</b>        | chr9:14784706-14834417    | 4.67   | 4.49   | -0.06     | 0.77 | 1.00 | - | - |
| <b>Zfp26</b>         | chr9:20428317-20460160    | 2.42   | 2.68   | 0.15      | 0.36 | 1.00 | - | - |
| <b>Abcg4</b>         | chr9:44273189-44288244    | 0.03   | 0.05   | 0.96      | 0.30 | 1.00 | - | - |
| <b>Dmxl2</b>         | chr9:54365157-54501626    | 22.39  | 23.62  | 0.08      | 0.59 | 1.00 | - | - |
| <b>Gm5136</b>        | chr10:108497649-109010975 | 0.00   | 0.00   | 0.00      | 1.00 | 1.00 | - | - |
| <b>lkzf4</b>         | chr10:128632414-128645993 | 0.00   | 0.00   | -0.14     | 0.95 | 1.00 | - | - |
| <b>Tcf3</b>          | chr10:80409164-80433653   | 14.79  | 14.93  | 0.01      | 0.93 | 1.00 | - | - |
| <b>Map2k2</b>        | chr10:81105946-81124697   | 28.87  | 29.66  | 0.04      | 0.79 | 1.00 | - | - |
| <b>Tubg2</b>         | chr11:101155883-101161787 | 0.03   | 0.03   | 0.15      | 0.92 | 1.00 | - | - |
| <b>Unk</b>           | chr11:116030321-116061194 | 6.87   | 6.71   | -0.03     | 0.84 | 1.00 | - | - |
| <b>Pycr1</b>         | chr11:120635711-120643670 | 0.11   | 0.08   | -0.45     | 0.49 | 1.00 | - | - |
| <b>Zrsr1</b>         | chr11:22899727-22982284   | 3.76   | 3.76   | 0.00      | 1.00 | 1.00 | - | - |
| <b>Cyfp2</b>         | chr11:46193848-46312859   | 1.65   | 1.69   | 0.03      | 0.88 | 1.00 | - | - |
| <b>Pmp22</b>         | chr11:63131509-63159546   | 104.67 | 120.81 | 0.21      | 0.14 | 1.00 | - | - |
| <b>Myo1g</b>         | chr11:6506547-6520958     | 28.34  | 28.85  | 0.03      | 0.85 | 1.00 | - | + |
| <b>Zkscan6</b>       | chr11:65807243-65829239   | 6.13   | 6.10   | -0.01     | 0.98 | 1.00 | - | - |
| <b>Myh13</b>         | chr11:67327102-67371502   | 0.00   | 0.00   | -1.8e+308 | 0.49 | 1.00 | - | - |
| <b>Tnfaip1</b>       | chr11:78522849-78536260   | 14.98  | 14.79  | -0.02     | 0.91 | 1.00 | - | - |
| <b>Aatf</b>          | chr11:84422855-84513501   | 8.33   | 8.91   | 0.10      | 0.62 | 1.00 | - | - |
| <b>Prps1I3</b>       | chr12:57230411-           | 9.47   | 9.91   | 0.07      | 0.69 | 1.00 | - | - |

| 57457241             |                           |         |         |       |      |      |   |   |
|----------------------|---------------------------|---------|---------|-------|------|------|---|---|
| <i>Rhob</i>          | chr12:8497758-8499985     | 81.65   | 79.56   | -0.04 | 0.79 | 1.00 | - | + |
| <i>Naip2</i>         | chr13:100144062-100202092 | 80.63   | 87.08   | 0.11  | 0.48 | 1.00 | - | - |
| <i>Ctsm</i>          | chr13:61536443-61541839   | 0.00    | 0.00    | 0.00  | 1.00 | 1.00 | - | - |
| <i>Slc12a7</i>       | chr13:73763696-73816742   | 5.93    | 4.32    | -0.46 | 0.01 | 0.18 | - | - |
| <i>Nr2f1</i>         | chr13:78188972-78236564   | 0.00    | 0.00    | 0.00  | 1.00 | 1.00 | - | - |
| <i>Mapk8</i>         | chr14:33377898-33447158   | 2.63    | 2.92    | 0.15  | 0.42 | 1.00 | - | - |
| <i>Ctsb</i>          | chr14:63122461-63177793   | 1245.17 | 1117.34 | -0.16 | 0.71 | 1.00 | - | - |
| <i>Akap11</i>        | chr14:78492245-78536860   | 5.72    | 5.33    | -0.10 | 0.49 | 1.00 | - | - |
| <i>Fbxo32</i>        | chr15:58175878-58214892   | 5.90    | 5.97    | 0.02  | 0.91 | 1.00 | - | - |
| <i>Dnm1l</i>         | chr16:16312232-16359030   | 10.24   | 10.92   | 0.09  | 0.54 | 1.00 | - | - |
| <i>Senp5</i>         | chr16:31959669-32003287   | 10.18   | 9.99    | -0.03 | 0.85 | 1.00 | - | - |
| <i>Tiam1</i>         | chr16:89787110-89974699   | 4.99    | 6.60    | 0.40  | 0.01 | 0.27 | - | + |
| <i>Cbr1</i>          | chr16:93607836-93610349   | 22.49   | 20.07   | -0.16 | 0.36 | 1.00 | - | - |
| <i>Itpr3</i>         | chr17:27057303-27122223   | 1.51    | 1.45    | -0.06 | 0.77 | 1.00 | - | + |
| <i>H2-T23</i>        | chr17:36029977-36032701   | 123.29  | 137.29  | 0.16  | 0.29 | 1.00 | - | - |
| <i>H2-BI</i>         | chr17:36080188-36084249   | 0.12    | 0.16    | 0.46  | 0.60 | 1.00 | - | - |
| <i>Pabpc6</i>        | chr17:9666496-9669704     | 0.00    | 0.00    | 0.00  | 1.00 | 1.00 | - | - |
| <i>Gnal</i>          | chr18:67088335-67245830   | 1.09    | 1.07    | -0.03 | 0.96 | 1.00 | - | - |
| <i>Cetn1</i>         | chr18:9618418-9619469     | 0.00    | 0.00    | 0.00  | 1.00 | 1.00 | - | - |
| <i>Tle4</i>          | chr19:14448071-14597983   | 8.14    | 7.82    | -0.06 | 0.72 | 1.00 | - | - |
| <i>Pank1</i>         | chr19:34810893-34879455   | 1.47    | 1.43    | -0.04 | 0.92 | 1.00 | - | - |
| <i>1700055N04Rik</i> | chr19:3958807-3970438     | 0.01    | 0.00    | -5.55 | 0.71 | 1.00 | - | - |
| <i>Ddx3y</i>         | chrY:1260714-1286613      | 0.00    | 0.00    | 0.00  | 1.00 | 1.00 | - | - |

FPKM, fragments per kilobase of exon per million fragments mapped.

<sup>1</sup>Differentially expressed as in Table S1.

<sup>2</sup>Involved in phagocytosis, if retrievable records on pubmed.gov using the search terms “gene xy phagocytosis”, and/or associated terms on geneontology.org, using unfiltered search parameters and considering all recorded species.
